# Supplementary material
Source: Research Square preprint supplement (doi:10.21203/rs.3.rs-8269809/v1)
Supplement: Supplementary file 1 [file 2468a897578daed2a13216f5.docx]

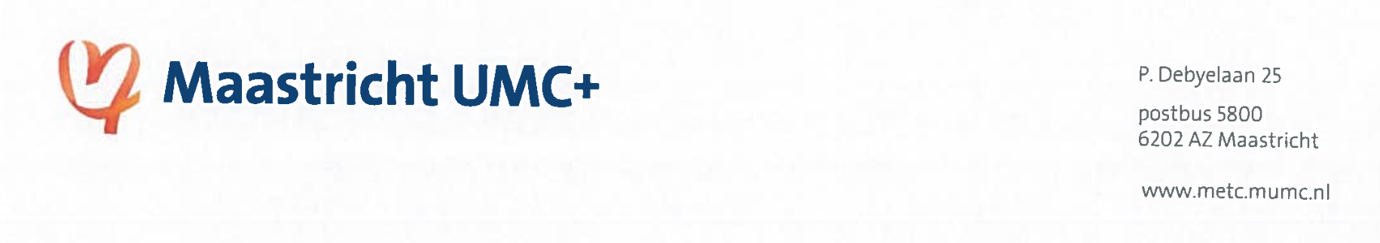


Prof. dr. A.J. Roefs

Department of Neuropsychology and Psychopharmacology

FPN, Maastricht University

**METC aZM/UM**

Our reference number is 23.0016557

Extension number: 043-3876009

Date: August 21, 2023

**Subject: Positive decision NL81710.068.23 / METC23-020**

**Title: Understanding Overweight and Obesity: The End of Average**

**Sponsor: Maastricht University**

**Principal investigator: Prof. Dr. A.J. Roefs**

**Applicant: Drs. A.C.M. van Oers**

Dear Prof. Dr. Roefs,

I hereby send you the position statement of the Medical Ethics Review Committee (MEC) azM/UM regarding the above-mentioned study.

The METC azM/UM approves the aforementioned study. For the considerations underlying this decision, I refer you to the attached decision.

The METC azM/UM would like to point out the obligations arising from the WMO (Social Support Act) and related regulations, an overview of which is included in the appendix to the attached decision.

Furthermore, the METC informs you that approval from the institutional management may also be required before the study can commence in the centers approved by the METC azM/UM.

We request that you inform all parties involved in the conduct of the study of this decision. You can use the digital version of the decision for this purpose, which can be found in ToetsingOnline, in the file for this study.

We also request that you submit a progress report on the implementation of the research to the committee by August 21, 2024 (one year after the date of the decision).

To whom it may concern: the medical research ethics committee MET azM/UM has

reviewed the above mentioned research file on the grounds of the Medical Research

involving Human Subjects Act (WMO) and has approved theresearch file.

I hope I have informed you sufficiently with this.

Yours faithfully,

On behalf of the METC aZM/UM,


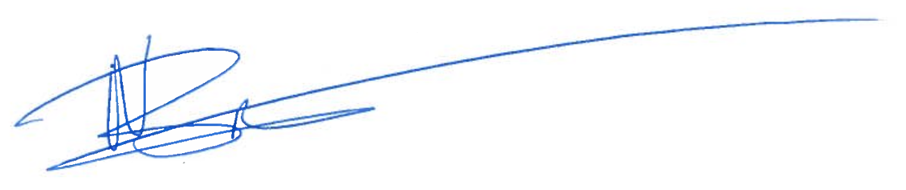


Ms. Dr. N.H. Broers, Administrative Secretary

Copies: Treasury, MUO-Finance, (digital)

CMO (digital)

Drs. A.C.M. van Oers, Department of Neuropsychology and Psychopharmacology, Maastricht University

**DECISION**

**Primary assessment**

| **NL number:** | **NL81710.068.23** | **METC number:** | **METC23-020** |
| --- | --- | --- | --- |
| **Title project:** | **UnderstandingOverweight and Obesity: The end of Average** | | |

Contact details: Prof. Dr. A. Roefs, Department of Neuropsychology and Psychopharmacology, Maastricht University.

Provider: Maastricht University and Maastricht.

**Decision**

The Medical Ethics Review Committee (MET) of azM/UM has, pursuant to Article 2, paragraph 2(a) of the *Medical Research Involving Human Subjects Act* (WMO),

deliberated on the above-mentioned research file.

**The committee approves of the research file to be conducted at the following center**:

- Maastricht University, principal investigator Prof. Dr. A.J. Roefs.
