# Supplementary material
Source: Research Square preprint supplement (doi:10.21203/rs.3.rs-8269809/v1)
Supplement: Supplementary file 2 [file 30d118ef83b32e441f24ab6c.docx]

|  | Maastricht University Faculty of Psychology and Neuroscience Clinical Psychological Science prof. dr. A.J. Roefs Universiteitssingel 40 6229 ER MAASTRICHT | | |  |
| --- | --- | --- | --- | --- |
|  |
|  |  | | |  |
| Date  Corresp.no.  File no.  Budget no. | 22 March 2022  2022/SGW/01240681  VI.C.211.010  14102 | Phone  Email  Website | 070-2440937  n.rotermundt@nwo.nl  www.nwo.nl/en |  |
| Round | NWO-Talentprogramma 2021 | | | |
| Title | Understanding Overweight and Obesity: The End of Average | | | |
|  | **Please include date, file number and correspondence number in any reply** | | | |
|  |  | | | |
| Subject | Grant award decision | | |  |
|  |  | | |  |

Dear professor Roefs ,

On March 11, 2022 NWO completed the decision-making process concerning the above-mentioned proposal. I am pleased to inform you that the the board of the Dutch Research Council Domain Social Sciences and Humanities has decided to award your proposal. NWO has assessed your proposal according to the procedure and criteria described in the Call for proposals. The assessment report is attached.

**Grant size**

The grant awarded is based on the application budget and is at most € 1.500.000.

The amount will be disbursed in instalments according to the information in the Start form (see attachment 4).

**Start of the project**

Your project may start no later than September 22, 2022.

**Which conditions and requirements apply?**

The Dutch General Administrative Law Act (in Dutch: Algemene wet bestuursrecht), the NWO Grant Rules 2017 ([www.nwo.nl/en/nwo-grant-rules](http://www.nwo.nl/en/nwo-grant-rules)), the condition mentioned in attachment 1 and all conditions included in the Call for proposals NWO-Talentprogramme Veni 2023 are applicable to this grant.

If you fail to satisfy these conditions and requirements, then this can have consequences for the amount of the grant.

**How to start your project?**

Before the project may start, you must satisfy several conditions. The documents and actions to be submitted via your ISAAC account are listed in the attached Guidelines and actions project leaders.

If all conditions have been met, you will receive a confirmation. The project can start and the first payment will follow.

**What else do you need to know?**

You can register for the digital newsletter of NWO via [www.nwo.nl/en/newsletter](http://www.nwo.nl/en/newsletter).

**Contact?**

If you have any questions about this project, then please contact Tessa Snel (t.snel@nwo.nl of +31 (0)70 349 46 75).

If you have any questions about this decision or if you are considering lodging an objection, you can contact Anne Toonders ([sgw-veni@nwo.nl](mailto:d.kortbeek@nwo.nl) of +31 (0)70 349 45 93) to get a further explanation. This contact does not have a suspensive effect for the objection period.

I wish you success with the realisation of your project.

Yours sincerely,

On behalf of the board of the Dutch Research Council Domain Social Sciences and Humanities,

Dr. I.M. Werner

director

Attachments:

1. Guidelines and actions project leader

2. Assessment report

3. Application budget

4. Start form

C.c.:

Finance and Control NWO

*The NWO Dutch Research Council Domain Social Sciences and Humanities is authorised to take this decision under a mandate from the NWO Executive Board. Please see:* [*www.nwo.nl/mandateregulation*](http://www.nwo.nl/mandateregulation)

*You have the right to lodge an objection to this decision within six weeks of the date of the decision letter. Your objection should be sent in writing or by mail to the NWO Executive Board, P.O. Box 93138, 2509 AC The Hague. It must be signed and dated, must specify your name and address, and must state the reasons why you object to the decision. A copy of this decision letter should be enclosed with your written objection. Further information about the objections procedure can be found on the NWO website.*

*You can also file your objection digitally. To do so, you can only use the email address that is provided by NWO for this: bezwaar@nwo.nl. Your digital objection must satisfy the same requirements as a written objection. Make sure that you scan your written objection or add a scanned signature in your objection.*

Guidelines and actions project leader

*This document contains instructions and actions that the project leader must carry out prior to the start of the project, during of the project and after completion of the project. Failure to meet with these guidelines can have consequences for the amount of the grant.*

| **Submission start documents and agreements:** Upload all required start documents and agreements via your ISAAC account. |
| --- |

| **To be able to start a project:** | |
| --- | --- |
| **What does NWO need from you?** | **Instructions** |
| Start form | Upload the fully completed Start form as a PDF document via your ISAAC account. The form must be signed by both the project leader and the financial manager.  *You will find the Start form attached to this grant award decision.* |
| Final budget | Upload the final budget via your ISAAC account. |
| Data management plan | Upload the detailed data management plan as a PDF document via your ISAAC account. A data management form is available via [www.nwo.nl/en/research-data-management](http://www.nwo.nl/en/research-data-management). |
| Ethical statement | If applicable, upload this as a PDF, signed by a competent body, via your ISAAC account. |
| Appointment of yourself and project members at the start | Enter the details of yourself and all project members, whose salaries are paid from the grant, to be appointed via your project in ISAAC / Choose ‘Projects’ on the menu bar and select your project / tab ’Project members’ / click ‘Add’ button.   - The duration of appointment should fall between the start and end date of the project and the position should be in accordance with the grant awarded. - It is only possible to register project members from the NFU and UNL rates in ISAAC. Project members from the HOT rates cannot be registered in ISAAC. - Do not register the details of the replacement for which the budget has been requested via the budget module 'replacement' in ISAAC, but include the replacement in the financial final report. |

| **During the project / continuously:** | |
| --- | --- |
| **What does NWO need from you?** | **Instructions** |
| Progress report | You will receive a request, including instructions, via email to supply a progress report or an interim evaluation in accordance with the conditions stated in the Call for proposals.  You can find the template for the progress report in your project in ISAAC under the ‘Project forms’ tab.  You should upload the completed report in your project in ISAAC under the ‘Reports’ tab. |
| Registration publications and other output | Each year in mid-October you will receive a request to submit the publications and output realised.  Register all your output until two years after the grant settlement via your project in ISAAC / select your project / tab ‘Product’ / click ‘Add’ button.   - in publications and other output, you must always include an acknowledgement with a reference to the NWO funding (see [www.nwo.nl/en/acknowledgement-publications](http://www.nwo.nl/en/acknowledgement-publications)); - when you add articles refer to the DOI number in the window intended for this.   Tip: Enter your publications and output on a regular basis to prevent a backlog. |
| Open Access / CC BY licence | Publications that emerge from this project must, at the moment of publication, be made immediately available (without embargo) in Open Access form, in accordance with the Open Access Procedure of NWO. The grant awarded by NWO bears the explicit condition, unless otherwise determined in the call for proposals, that an irrevocable, non-exclusive CC BY licence applies to the author’s version of all publications emerging from this grant. You should make the existence of this licence known to each party who you consult with concerning the publication of (a part of) the project results. Failure to meet the aformentioned conditions can lead to a change in and/or adjustment in the determination of the grant. NWO is at all times entitled to inform third parties of this licence. For more information about the Open Access policy of NWO see: [www.nwo.nl/en/open-science](http://www.nwo.nl/en/open-science). |
| Change requests, e.g. for personnel or budget shifts | Changes should be requested in advance via the request for change form (see the ‘Requests for change’ tab in your ISAAC account or [www.nwo.nl/en/project-changes](http://www.nwo.nl/en/project-changes)) and be approved by NWO. Upload your request for change via your project in ISAAC / Choose ‘Projects’ on the menu bar and select your project / tab ‘Requests for change’ / click ‘Add’ button.  If you want to know which change is applicable, then please consult the changes decision tree via [www.nwo.nl/en/project-changes](http://www.nwo.nl/en/project-changes). |
| Appointment project members during the duration of the project | Enter the details of all project members to be appointed via your project in ISAAC / Choose ‘Projects’ on the menu bar and select your project / tab ‘Project members’ / Click ‘Add’ button.  Please note: The duration of appointment should fall between the start and end date of the project and the position should be in accordance with the grant award decision or the request for change. |

| **At the end of the project:** | |
| --- | --- |
| **What does NWO need from you?** | **Instructions** |
| Final report | One month before the planned end date of your project you will receive an email with a request and instructions to deliver a final report and/or financial final report. The deadline for submission is three months after the end date of your project.  You will find the template for the final report in your project in ISAAC under ‘Project forms’.  You should upload the completed report via your ISAAC account under ‘Reports’. |

| **Other:** | |
| --- | --- |
| **Information** | **Instructions** |
| Authorisation ISAAC account | If you wish, you can grant people involved in the project access to your project in ISAAC. To do so, you should download the authorisation form via your project in ISAAC / Choose ‘Projects’ on the menu bar and choose your project / tab ‘Project access’. Upload the completed form via your project in ISAAC via ‘Project documents’. |
